# Supplementary material for: Prevalence of intestinal parasites and comparison of detection techniques for soil-transmitted helminths among newly arrived expatriate labors in Jeddah, Saudi Arabia
Source: PeerJ. 2024 Jan 26;12:e16820. doi: 10.7717/peerj.16820 (PMC10823990; doi:10.7717/peerj.16820)
Supplement: Supplemental Information 1 — Raw data for the shown results in Figure 1 and Table 5. [file peerj-12-16820-s001.xlsx]

## Sheet: Sheet2
	Detected Parasite	No. of cases	%	Detection Technique	Detected stage by (a)
	Entamoeba coli	9	4.79	a	Cyst
	Trichuris trichiura	7	3.72	a + b	Egg
	Necator americanus	6	3.19	a + b	Egg
	Strongyloides sterocoralis	4	2.13	a + b	Rh larva
	Ascaris lumbricoides	4	2.13	a + b	Egg
	Entamoeba histolytica	4	2.13	a + c	Cyst
	Blastocystis hominis	3	1.6	a	Cyst
	Ancylostoma duodenale	2	1.06	a + b	Egg
	Giardia lamblia	2	1.06	a + c	Cyst
	Iodamoeba buetschlii	1	0.53	a	Cyst
	Hymenolepis nana	1	0.53	a	Egg
	Endolimax nana	1	0.53	a	Cyst
	Heterophyes heterophyes	1	0.53	a	Egg
				a Using light microscopy.
				b Using real-time PCR.
				c Using rapid chromatographic immunoassay test.
			Note: The ggs of both hookworm species (N. americanus and A. duodenale) are identical under the light microscop.
